# Supplementary material
Source: HighWire-hosted journal article supplement (http://www.qdcxjkg.com/highwire/filestream/114453/field_highwire_adjunct_files/3/ERJ-00388-2014_supplementary_table_S1.pdf)
Supplement: ERJ-00388-2014_supplementary_table_S1.pdf [file ERJ-00388-2014_supplementary_table_S1.pdf]

**Supplementary table 1.** Comparison of baseline demographics between patients with  $\geq 1$  HCRU event and  $\geq 1$  EXACT-identified event and between patients with only HCRU events and EXACT-unreported events

|                             | $\geq 1$ HCRU<br>event <sup>a</sup><br><br>n=138 | $\geq 1$ EXACT-identified<br>event <sup>a</sup><br><br>n=261 | p<br>value | Patients with only<br>HCRU events<br><br>n=69 | Patients with EXACT-<br>unreported events<br><br>n=192 | p<br>value |
|-----------------------------|--------------------------------------------------|--------------------------------------------------------------|------------|-----------------------------------------------|--------------------------------------------------------|------------|
| Sex                         |                                                  |                                                              |            |                                               |                                                        |            |
| Male, n (%)                 | 90 (65.2)                                        | 171 (65.5)                                                   | 0.952      | 49 (71.0)                                     | 130 (67.7)                                             | 0.612      |
| Age, mean years<br>(95% CI) | 62.7<br>(61.4–64.0)                              | 62.6<br>(61.6–63.6)                                          | 0.896      | 64.0<br>(62.2–65.8)                           | 63.0<br>(61.9–64.2)                                    | 0.371      |
| Region, n (%)               |                                                  |                                                              | 0.001      |                                               |                                                        | <0.001     |
| Eastern Europe              | 63 (45.7)                                        | 147 (56.3)                                                   |            | 31 (44.9)                                     | 115 (59.9)                                             |            |
| Western Europe              | 31 (22.5)                                        | 72 (27.6)                                                    |            | 14 (20.3)                                     | 55 (28.7)                                              |            |
| South Africa                | 44 (31.9)                                        | 42 (16.1)                                                    |            | 24 (34.8)                                     | 22 (11.5)                                              |            |
| COPD severity, n (%)        |                                                  |                                                              |            |                                               |                                                        | 0.212      |
| Stage I–II                  | 83 (60.1)                                        | 173 (66.5)                                                   | 0.205      | 42 (60.9)                                     | 132 (69.1)                                             |            |

|                                                 |                     |                     |       |                     |                     |       |
|-------------------------------------------------|---------------------|---------------------|-------|---------------------|---------------------|-------|
| Stage III–IV                                    | 55 (39.9)           | 87 (33.5)           |       | 27 (39.1)           | 59 (30.9)           |       |
| Baseline FEV <sub>1</sub> ,<br>L (95% CI)       | 1.39<br>(1.31–1.48) | 1.49<br>(1.43–1.54) | 0.075 | 1.37<br>(1.25–1.48) | 1.51<br>(1.44–1.58) | 0.032 |
| Predicted FEV <sub>1</sub> ,<br>% (95% CI)      | 49.1<br>(46.8–51.4) | 52.2<br>(50.6–53.9) | 0.026 | 48.2<br>(45.0–51.5) | 53.1<br>(51.2–54.9) | 0.010 |
| Absolute change reversibility,<br>mean (95% CI) | 0.15<br>(0.12–0.18) | 0.13<br>(0.11–0.15) | 0.342 | 0.18<br>(0.14–0.23) | 0.14<br>(0.12–0.16) | 0.059 |
| ICS use, n (%)                                  | 69 (50.0)           | 140 (53.6)          | 0.489 | 36 (52.2)           | 107 (55.7)          | 0.611 |
| BDI focal score, mean (95% CI)                  | 6.53<br>(6.19–6.86) | 6.73<br>(6.48–6.98) | 0.344 | 6.64<br>(6.10–7.17) | 6.84<br>(6.54–7.15) | 0.499 |
| Baseline SGRQ total score,<br>mean (95% CI)     | 47.7<br>(44.7–50.7) | 46.1<br>(44.1–48.2) | 0.396 | 46.4<br>(41.9–50.9) | 45.1<br>(42.7–47.5) | 0.593 |

Note: Region: Eastern Europe (Czech Republic, Hungary, Poland, Russia and Ukraine), Western Europe (France, Germany, Italy and Spain).

P-values are based on chi-square for categorical variables (sex, COPD severity, ICS use, country) and t-test for continuous variables (age, FEV<sub>1</sub>, reversibility, BDI focal score, SGRQ total score) testing the equality.

<sup>a</sup>Patients with at least one exacerbation.

BDI, baseline dyspnoea index; CI, confidence interval; COPD, chronic obstructive pulmonary disease; FEV<sub>1</sub>, forced expiratory volume in 1 second; EXACT, EXacerbations of Chronic obstructive pulmonary disease Tool; HCRU, Healthcare Resource Utilisation; ICS, inhaled corticosteroids; SGRQ, St George's Respiratory Questionnaire.
